# Supplementary material for: Molecular imaging with engineered physiology
Source: PubMed Central journal article supplement (PMC5146284; doi:10.1038/ncomms13607), 2016-12-02
Supplement: ncomms13607-s1.pdf [file ncomms13607-s1.pdf]

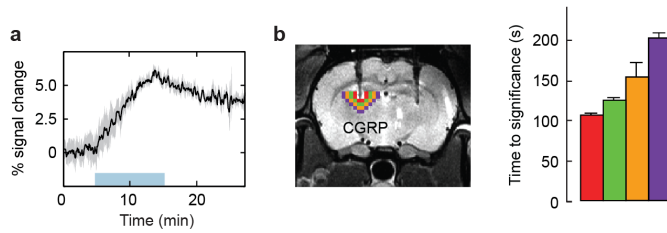

**Supplementary Fig. 1. Time course of MRI signal during CGRP infusion in rat brain. (a)** Time course of mean MRI signal change (black line) observed before, during (blue bar), and after 0.1  $\mu\text{L}/\text{min}$  infusion of 100 nM wtCGRP into rat thalamus. Signals were averaged over six animals in 1.5 mm square regions of interest (ROIs) positioned around the infusion cannulae tips in each animal (cf. Fig. 2d); gray shading denotes standard errors as a function of time. **(b)** Time courses from multiple approximately concentric ROIs (diagrammed at left) were analyzed to determine whether hemodynamic MRI has sufficient spatial resolution to monitor convection of CGRP from the infusion site. For each ROI, the delay between the start of infusion and the observation of statistically significant signal changes from baseline was measured (color coded bars at right). The onset of significant signal changes increases monotonically with distance from the cannula tip, consistent with the expected spread of the imaging agent during infusion. Times to significance observed in peripheral ROIs (green, brown, and purple) were all significantly longer than the time to significance observed for the innermost ROI (red, all pairwise  $t$ -tests  $p < 0.05$ ). Error bars denote SEM; all measurements  $n = 6$ .

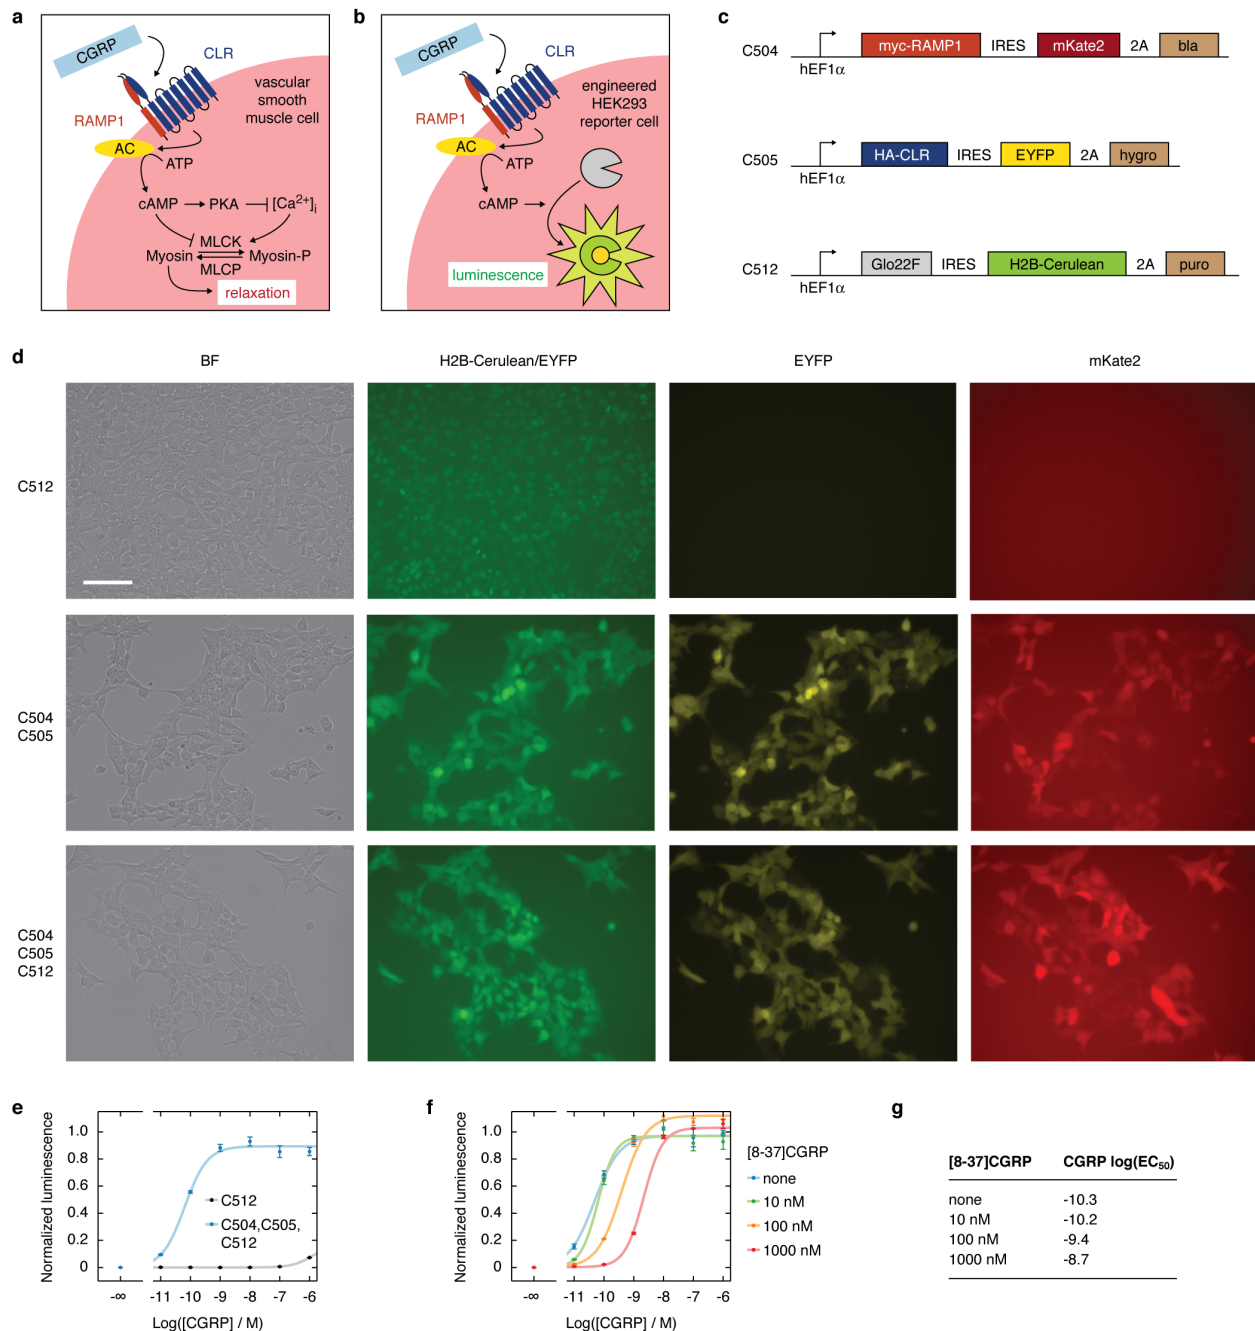

**Supplementary Fig. 2. Cell-based bioassay for CGRP activity.** (a) Mechanism of vasodilation by CGRP. CGRP peptide binds and activates the heterodimeric CGRP receptor (RAMP1:CLR) on vascular smooth muscle cells (VSMCs). Activation of adenylate cyclase (AC) results in cyclic adenosine monophosphate (cAMP) production that acts through protein kinase A (PKA)-dependent and independent pathways to inhibit myosin light chain kinase (MLCK), resulting in VSMC relaxation and blood vessel dilation. (b) Engineered HEK293FT reporter cells provide a readout of cAMP accumulation upon activation of the CGRP receptor via a constitutively expressed, cAMP-responsive luciferase variant, Glo22F (Promega). (c) Lentiviral transgenes used to construct the CGRP reporter cell line. Full sequences provided in Supplementary Information.

**(d)** Fluorescence micrographs verifying expression of fluorescent reporters expressed by vectors encoding the Glo22F luciferase (C512) and the heterodimeric CGRP receptor components (C504 and C505) in cell lines transfected with constructs as noted at left. Color channels (labeled at top) depict bright field (BF) images, H2B-Cerulean (nuclear) with bleed-through from EYFP (cytosolic), EYFP alone, and mKate2. **(e-g)** Pharmacological validation of the reporter cell line, with error bars denoting SD of measurements performed in triplicate. **(e)** Dose-response curve for synthetic wild-type human alpha CGRP for reporter cell line infected with lentiviruses C504, C505, and C512 (blue) and for a cell line transfected with the cAMP reporter vector C512 but not the CGRP receptor vectors (gray). Luminescence values were normalized to the range evoked by buffer vs. 100  $\mu$ M forskolin for each cell line. **(f)** Dose-reponse curves for CGRP in absence or presence of different concentrations of the competitive inhibitor [8-37]CGRP, a C-terminal fragment of CGRP. Luminescence values were normalized to the range obtained with buffer vs. 100 nM CGRP. **(g)** Tabulated potencies for CGRP in the presence of different [8-37]CGRP concentrations. SEM values were all less than 0.1 ( $n = 7$ ).

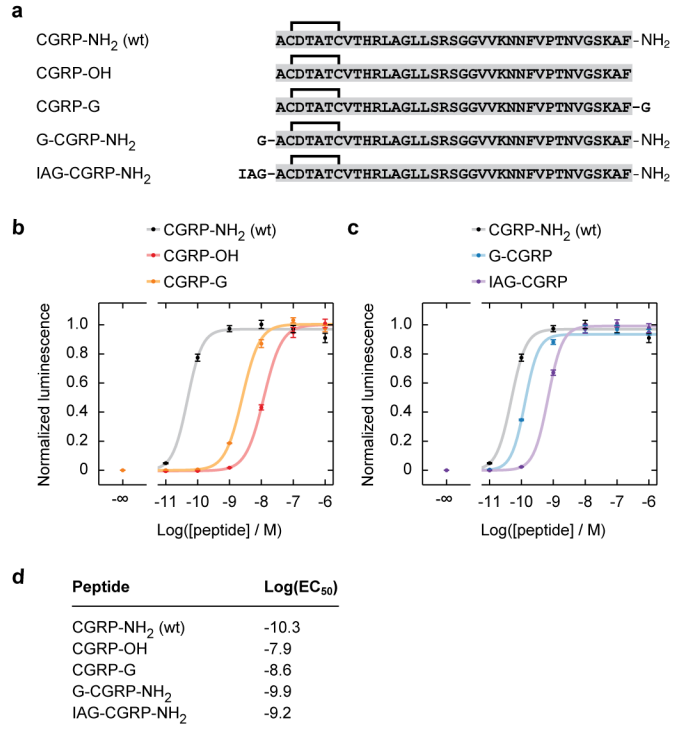

**Supplementary Fig. 3. Impact of small terminal modifications on CGRP potency.** (a) Sequence of peptide variants. -NH<sub>2</sub> denotes an amidated C-terminus; CGRP-OH and CGRP-G contain a regular C-terminal carboxylate. Bioassays were performed with peptides serially diluted into water plus 0.1% CHAPS from 100  $\mu$ M stock solutions in water or 50% DMSO. Error bars denote SD of measurements performed in triplicate. (b) Dose-response curves for C-terminally modified CGRP variants. Values normalized to the range obtained with buffer vs. 100 nM wtCGRP stimulation. (c) Dose-response curves for N-terminally modified CGRP variants. (d) Half maximal potencies, presented as log(EC<sub>50</sub>), determined from the dose-response data in panels b and c. Standard errors were all less than 0.1 ( $n = 7$ ).

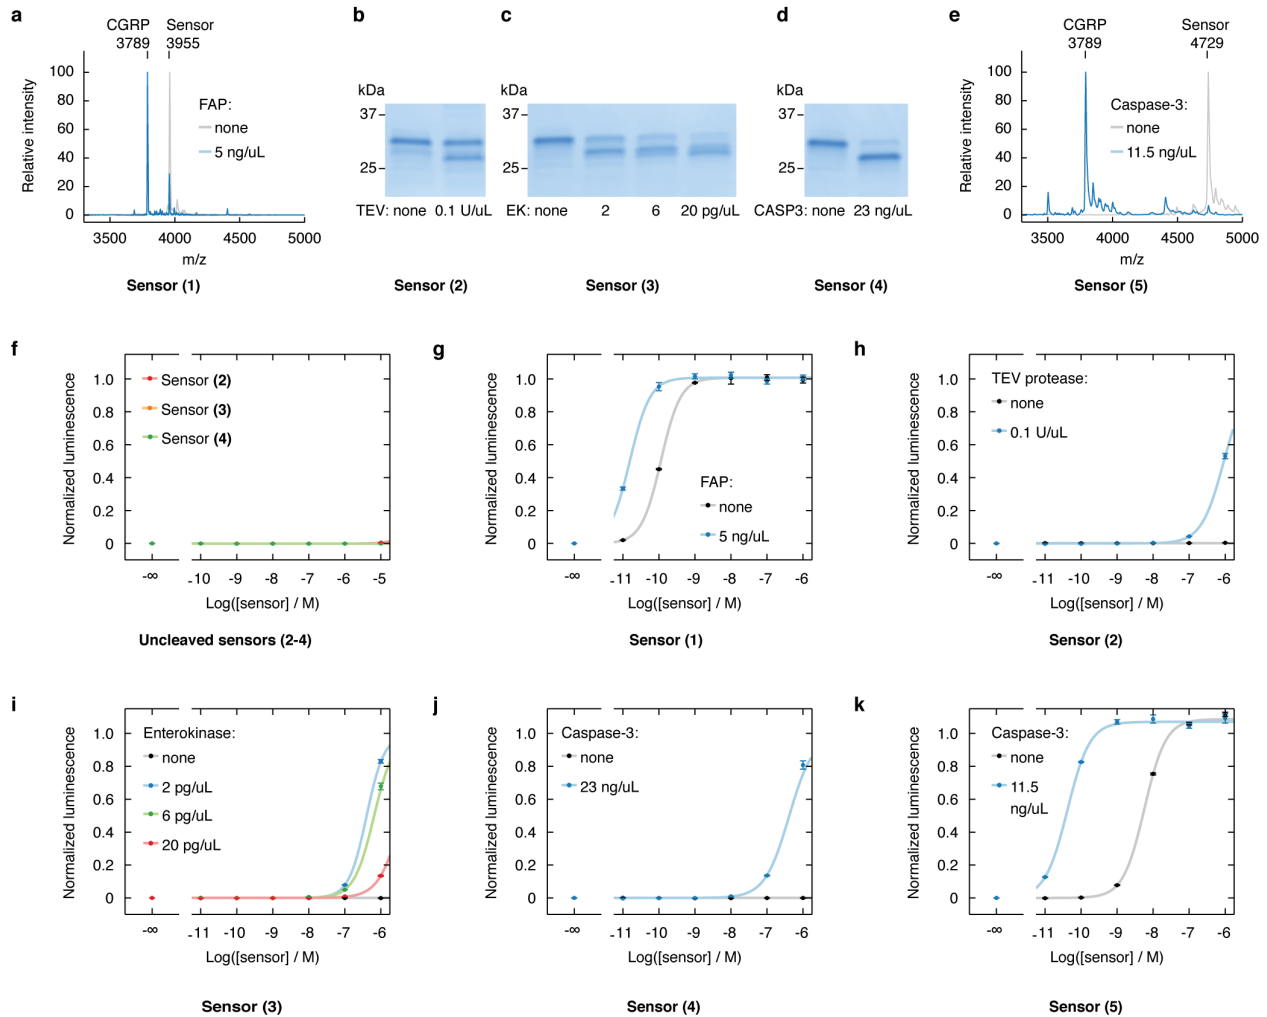

**Supplementary Fig. 4. Proteolytic cleavage of candidate sensors and assessment by bioassay.** (a-e) Cleavage reaction products after incubation of 10  $\mu$ M sensor with or without enzyme for 2 h at 37  $^{\circ}$ C. (a) MALDI mass spectrum of sensor (1) after incubation with or without FAP shows near-complete cleavage and liberation of free CGRP. (b) SDS-PAGE analysis of sensor (2) after incubation with or without TEV protease shows substantial but not complete cleavage. (c) SDS-PAGE analysis of sensor (3) after incubation with different concentrations of EK light chain shows increasing cleavage with increasing concentrations. (d) SDS-PAGE analysis of sensor (4) after incubation with or without caspase-3 shows near-complete cleavage. (e) MALDI mass spectrum of sensor (5) after incubation with or without caspase-3 shows complete cleavage and liberation of free CGRP. (f-k) Dose-response curves of uncleaved and cleaved sensors in cell-based bioassay. All measurements were normalized to blank=0 and 100  $\mu$ M wtCGRP = 1.0. (f) Dose-response curves for Sensors (2-4) at final assay concentrations up to 10  $\mu$ M (addition of 10  $\mu$ L of 100  $\mu$ M solution to 90  $\mu$ L medium per well in bioassay) show no receptor activation by uncleaved GFP-linker-CGRP-G sensors even at 10-fold higher concentrations than were used in cleavage assays (g-k). (g-k) Dose-response curves for reaction products from (a-e). Error bars in (f-k) denote SD of measurements performed in triplicate.

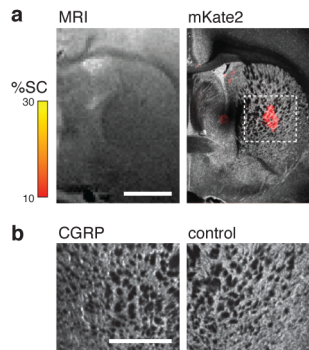

**Supplementary Fig. 5. MRI and histological signals from injected control cells. (a)** Comparison of MRI (left) and optical microscopy (right) images of a field of view near injection of control HEK293FT cells in an individual animal, paralleling the data in main text Fig. 4e. The MRI scan shows no colored voxels overlaid on the grayscale anatomical image because MRI signal changes over 10% were not observed within a day of control cell implantation; this is in contrast to MRI results from CGRP-expressing cells in Fig. 4e. The histological image shows a bright field grayscale image, with mKate fluorescence in red overlaid to indicate the distribution of injected cells. Scale bar = 2 mm. **(b)** Close-ups of bright field images in the neighborhood of cell implantation on CGRP-expressing (left) and control cell (right) injection sites in a representative animal, showing normal patch-matrix striatal structural organization on both sides. The field of view corresponds to the rectangular box in panel a (right). Scale bar = 1 mm.

**Supplementary Table 1. Catalog of plasmids used in this study**

| <b>ID</b> | <b>Name</b>                                | <b>Source</b> |
|-----------|--------------------------------------------|---------------|
| Z503      | pEXPR-T7-cfSGFP2-DEVD-CGRP-G               | This study    |
| Z507      | pEXPR-T7-cfSGFP2-DDDDK-CGRP-G              | This study    |
| Z508      | pEXPR-T7-cfSGFP2-ENLYFQG-CGRP-G            | This study    |
| C501      | pLV-hEF1a-mKate-2A-bla                     | This study    |
| C503      | pLV-hEF1a-prepro-CGRP-IRES-mKate-2A-bla    | This study    |
| C504      | pLV-hEF1a-myc-RAMP1-IRES-mKate-2A-bla      | This study    |
| C505      | pLV-hEF1a-HA-CALCRL-IRES-EYFP-2A-Hygro     | This study    |
| C512      | pLV-hEF1a-Glo22F-IRES-H2B-Cerulean-2A-puro | This study    |
| X106      | pMD2.G                                     | Addgene 12259 |
| X107      | psPAX2                                     | Addgene 12260 |
| X108      | pLenti X1 Zeo DEST (668-1)                 | Addgene 17299 |
| X109      | pEF-ENTR A (696-6)                         | Addgene 17427 |

**Supplementary Table 2. Full sequence for bacterial expression plasmid Z503 (pEXPR-T7-cfSGFP2-DEVD-CGRP-G)**

*color coding key:*

cfSGFP2: cysteine-free GFP variant (with N-terminal StrepII tag underlined)

Cleavable linker

haCGRP-Gly: Human alpha CGRP extended with one C-terminal glycine residue

Kanamycin resistance gene

pBR322 origin of replication

*sequence:*

```
GCTCAGAGGATCGAGATCTCGATCCCGCGAAATTAATACGACTCACTATAGGGAGAGCCACAACGGTTTCCCTCTAGAAAATAATTT
TGTTTAACTTTAAGAAGGAGATATACATATGAGCGCGTGGAGCCATCCGCGAGTTTGAAAAAGGTGCTGTATCCAAGGGCGAAGAGC
TGTTACGGGGCGTAGTACCGATTTTGGTGGAGCTGGACGGCGATGTGAACGGCCATAAATTTAGTGTGAGCGGGCGAAGGTGAGGGC
GATGCGACATATGGCAAACCTGACCTGAAATTTATAGTACCACCGGTAAACTGCCAGTGCCCTTGCCCGACGCTGGTTACCACCCCT
GACCTACGGTGTGCAAATGTTTCGCTCGCTACCCCGACCATATGAAACAGCATGACTTCTTCAAGAGCGCAATGCCGGAAGGTTACG
TGCAGGAGCGTACGATTTTTTCAAAGATGATGGGAATTACAAGACACGTTGCCGGAAGTGAATTCGAGGGCGATACGCTGGTTAAT
CGCATCGAAGTGAAGCGCATCGACTTCAAAGAAGATGGTAACATTTCTGGGTCACAGCTTGAATACAACATACTACATAACGTT
ATATATCACAGCAGATAAGCAGAAGAATGGTATTAAGGCGAATTTCAAGATCCGTCACAATATTGAGGATGGCGGTGTTTCAGTTAG
CTGATCATTATCAACAGAACACCCCTATTGGAGATGGCCAGTGTGCTGCCAGATAATCATTACCTGTCTACCCAGAGCAAACCTG
AGCAAAGACCCTAATGAGAAACGTGATCATATGGTCTTACTGGAGTTCGTTACAGCGGGCGGCATTACGCTGGGTATGGATGAGCT
GTATAAGGGTGGCTCAGGTGATGAAGTAGATGCTTGTGACACAGCCACCTGTGTCAACCACCGCTGGCCGGTCTGCTGTCTCGCT
CGGGTGGCGTGTGTTAAAAACAATTTTGTGCCAACCAATGTTGGTTCAAAAAGCGTTTGGCTAACAAAGCCCGAAAGGAAGCTGAGTT
GGTGCTGCCACCGCTGAGCAATAACTAGCATAACCCTTGGGGCCTCTAAACGGGTCTTGAGGGGTTTTTGTGTAAGGAGGAA
CTATATCCGGATATCCACAGGACGGAGGTAGCTCTGGCCCGTGTCTCAAAATCTCTGATGTTACATTGCACAAGATAAAAAATATAT
CATCATGAACAATAAACTGTCTGCTTACATAAACAGTAATACAAGGGGTGTTATGAGCCATATCAACGGGAAACGTCGAGGCCG
CGATTAAATCCAACATGGATGCTGATTTATATGGGTATAAATGGGCTCGCGATAATGTGGGCAATCAGGTGCGACAATCTATCG
CTTGATGGGAAGCCCGATGCGCCAGAGTTGTTTCTGAAACATGGCAAAGGTAGCGTTGCCAATGATGTTACAGATGAGATGGTCA
GACTAAACTGGCTGACGGAAATTTATGCCTCTTCCGACCATCAAGCATTTTATCCGTACTCCTGGTGATGCATGGTTACTCACCCT
GCGATCCCCGGAAAAACAGCATTCCAGGTATTAGAAGAATATCTGATTCAGGTGAAAATATTGTTGATGCGCTGGCAGTGTTCCT
GCGCCGTTGCATTCGATTCCTGTTTGTAAATGTCCTTTTAAACAGCGATCGCGTATTTGCGCTCGCTCAGGCGCAATCACGAATGA
ATAACGTTTTGGTTGATGCGAGTGATTTTGTATGACGAGCGTAATGGCTGGCCTGTGAACAAGTCTGGAAAGAAATGCATAAACTT
TTGCCATTCTCACCAGGATTCAGTCGTCCTCATGGTATTCTCACTTGATAACCTTATTTTTGACGAGGGGAAATTAATAGGTTG
TATTGATGTTGGACGAGTCGGAATCGCAGACCGATACCAGGATCTTGCCATCCTATGGAACCTGCCCTGGTGAGTTTTCTCCTTCAT
TACAGAAACGGCTTTTTCAAAAATATGGTATTGATAATCTGATATGAATAAATTCAGTTTCATTTGATGCTCGATGAGTTTTTC
TAAATCAGAATTGGTTAATTGGTTGTAACATTATTAGATTGGGCCCGGTTCCACTGAGCGTCAGACCCCGTAGAAAAGATCAAAGG
ATCTTCTTGAGATCCTTTTTTCTGCGCGTAATCTGCTGCTTGCAAAACAAAAAACCACCGCTACCAGCGGTGGTTTGTGTTGCCGG
ATCAAGAGCTACCAACTCTTTTTCCGAAGGTAACCTGGCTTCAGCAGAGCGCAGATACCAAATACGTTCTTCTAGTGTAGCCGTAG
TTAGCCACCACCTCAAGAACTCTGTAGCACCAGCTACATACCTCGCTCTGCTAATCCTGTTACCAGTGGCTGCTGCCAGTGGCGA
TAAGTCGTGTCTTACCGGTTGGACTCAAGACGATAGTTACCGGATAAGGCGCAGCGGTGGGCTGAACGGGGGGTTCGTGCACAC
AGCCAGCTTGGAGCGAACGACCTACACCGAACTGAGATACCTACAGCGTGAGCTATGAGAAAGCGCCACGCTTCCCGAAGGGAGA
AAGCGGACAGGTATCCGGTAAGCGGCAGGGTCCGAAACAGGAGAGCGCACAGGGAGCTTCCAGGGGAAACGCTGGTATCTTTA
TAGTCTGTGCGGTTTCGCCACCTCTGACTTGAGCGTCGATTTTTGTGATGCTCGTCAGGGGGGGGAGCCTATGAAAAACGCCA
GCAACGCGGCCTTTTTACGGTTCCTGGCCTTTTGTGCTGACATGTTCTTCTGCTGATGCTGATGCTGATGCTGATGCTGATGCTGAT
AACCCTATTACCGCTAGCATGGATCTCGGGGACGCTAACTACTAAGCGAGAGTAGGGAACCTGCCAGGCATCAAATAAAAACGAAAG
GCCAGTCTTCCGACTGAGCCTTTCGTTTTATCTGTTGTTTGTGCGGTGAACGCTCTCTGAGTAGGACAAATCCGCCGGGAGCGGA
TTTGAACGTTGTGAAGCAACGGCCCGAGGGTGGCGGGCAGGACGCCCGCCATAAACTGCCAGGCATCAAATAAGCAGAAGGCCA
TCCTGACGGATGGCCTTTTTGCGTTTCTACAACTCTTCTGTTAGTTAGTTACTTAA
```



**Supplementary Table 3. DNA and amino acid sequence of cleavable linkers for all bacterial expression plasmids**

|                                        |                                                                    |
|----------------------------------------|--------------------------------------------------------------------|
| Z503 (pEXPR-T7-cfSGFP2-DEVD-CGRP-G)    | <b>GGTGGCTCAGGTGATGAAGTAGAT</b><br>G G S G D E V D                 |
| Z507 (pEXPR-T7-cfSGFP2-DDDDK-CGRP-G)   | <b>GGTGGCTCAGGTGACGATGATGACAAG</b><br>G G S G D D D D K            |
| Z508 (pEXPR-T7-cfSGFP2-ENLYFQG-CGRP-G) | <b>GGTGGCTCAGGTGAAAACCTTGTATTTCCAGGGT</b><br>G G S G E N L Y F Q G |

**Supplementary Table 4. Full sequence of lentiviral plasmid C501 (pLV-hEF1a- mKate-2A- bla)**

*color coding key:*

**hEF1a: Human elongation factor 1 alpha promoter**

Transgene cassette: **mKate2: Red fluorescent protein**

**2A: Autoproteolytic viral amino acid sequence**

**Bla: Blastidicin resistance gene**

**delta\_U3 / 3'LTR: HIV 3'LTR with deletion in the U3 region**

**AmpR: Ampicillin resistance gene**

**pUC origin of replication**

**RSV / 5'LTR: Rous Sarcoma Virus / HIV 5'LTR hybrid promoter**

**Psi: Lentiviral Psi packaging sequence**

**RRE: Rev response element**

**CPPT: Central polypurine tract**

*sequence:*

```
CTTTGCAGCTAATGGACCTTCTAGGCTTGAAGGAGTGGGAATTGGCTCCGGTGCCCGTCAGTGGGCAGAGCGCACATCGCCCCAC
AGTCCCCGAGAAGTTGGGGGAGGGGTCCGCAATTGAACCGGTGCCTAGAGAAGGTGGCGCGGGTAAACTGGGAAAGTGATGTCG
TGTACTGGCTCCGCCCTTTTCCCGAGGGTGGGGGAGAACCCTATAAAGTGCAGTAGTCGCCGTGAACGTTCTTTTTCGCAACGGG
TTTGCCGCCAGAACACAGGTAAGTGCCGTGTGTGGTTCCCGCGGGCTGGCCTCTTTACGGGTTATGGCCCTTGCCTGCTTGAAT
TACTTCCACCTGGCTGCAGTACGTGATTCTTGATCCCGAGCTTCGGGTTGGAAGTGGGTGGGAGAGTTCGAGGCCCTTCGCTTAAAG
GAGCCCTTCGCTCGTGTGTTGAGTTGAGGCCTGGCCTGGGCGCTGGGGCCGCCGCTGCGAATCTGGTGGCACCTTCGCGCCTGT
CTCGCTGCTTTTCGATAAGTCTCTAGCCATTTAAAAATTTTGTAGACTGCTGCGACGCTTTTTTCTGGCAAGATAGTCTTGTAAA
TGCGGGCCAAGATCTGCACACTGGTATTTTCGGTTTTCGGGGCCGCGGGCGGCGACGGGGCCCGTGCCTCCAGCGCACATGTTCCG
CGAGGCGGGGCTGCGAGCGCGGCCACCGAGAATCGGACGGGGGTAGTCTCAAGCTGGCCGGCCTGCTCTGGTGCCTGGCCTCGG
CCGCGGTGTATCGCCCGCCCTGGGCGCAAGGCTGGCCGGCTCGGCACCAAGTTGCGTGAGCGGAAAGATGGCCGCTTCCCGGCC
TGCTGCAGGGAGCTCAAAATGGAGGACCGGCGCTCGGGAGAGCGGGCGGGTGAAGTCAACACAAAGGAAAAGGGCCTTCCCGT
CCTCAGCCGTCGCTTCATGTGACTCCAGGAGTACCGGGCGCCGTCAGGCACCTCGATTAGTTCTCGAGCTTTTGGAGTACGTCG
TCTTTAGGTTGGGGGAGGGTTTTATGCGATGGAGTTTCCACACTGAGTGGGTGGAGACTGAAGTAGGCCAGCTTGGCACTT
GATGTAATTTCTCCTTGGAAATTTGCCCTTTTGTAGTTGGATCTTGGTTCATTCTCAAGCCTCAGACAGTGGTTCAAAGTTTTTTT
TTCCATTTCAAGGTGCTGTGAGGAATTAGCTTGGTACTAATACGACTCACTATAGCCTGGCCACCATGGTGAGCGAGCTGATTAAG
AGAATATGCACATGAAGCTGTACATGGAGGGCACCGTGAACAACCACTTCAAGTGCACATCCGAGGGCGAAGGCAAGCCCTAC
GAGGGCACCCAGACCATGAGAATCAAGGCGGTGAGGGCGCCCTCCTCCCTTCGCTTCGACATCCTGGTACCAGCTTCATGTA
CGGCAGCAAAACCTTCATCAACCACACCCAGGGCATCCCCGACTTCTTTAAGCAGTCTTCCCGAGGGCTTCACATGGGAGAGAG
TCACCACATACGAAGATGGGGGCGTGTGACCGCTACCCAGGACACCAGCCTCCAGGACGGCTGCCTCATCTACAACGTCAAGATC
AGAGGGTGAACCTCCCATCCAACGCCCTGTGATCGAGAAGAAAACACTCGGCCTGGGAGGCCTCCACCGAGACTGTACCCCGC
TGACGGCGGCTGGAAGGCAGAGCCGACATGGCCCTGAAGCTCGTGGGCGGGGGCCACCTGATCTGCAACCTTAAGACCACATACA
GATCCAAGAACCCTGTAAGAACCCTAAGATGCCCGGCTCTACTATGTGGACAGGAGACTGGAAAGAATCAAGGAGGCCGACAAA
GAGACATAGCTCGAGCAGCAGGTGGCTGTGGCCAGATACTGCCACTCCCTAGCAAACCTGGGGCACAACTTAATTCCGCTGA
GGCCCGGGCAGCCTGCTGACCTGCGGCGACGTGGAGGAAAACCCAGGCCCAATGGCTAAGCCTTTGTCTCAAGAAGAATCCACCC
TCATTGAAAGAGCAACGGCTACAATCAACAGCATCCCCATCTCTGAAGACTACAGCGTCGCCAGCGCAGCTCTCTCTAGCGACGGC
CGCATCTTCACTGGTGTCAATGTATATCATTTTTACTGGGGACCTTGTGCAGAACTCGTGGTGTGGGCACTGCTGCTGCTGCGGC
AGCTGGCAACCTGACTTGTATCGTGCAGATCGGAAATGAGAACAGGGGCATCTTAGCCCTGCGGACGGTGCAGAGGTGCTT
TCGATCTGCATCCTGGGATCAAAGCCATAGTGAAGGACAGTATGGACAGCCGACGGCAGTTGGGATTCGTGAATTGCTGCCCTT
GGTTATGTGTGGGAGGGATAAGGGACAGGTGATATCCAGCAGTGGCGGCCGTCGACAATCAACCTCTGGATTACAAAATTTGT
GAAAGATTGACTGGTATTCTTAACATAGTTGCTCCTTTTACGCTATGTGGATACGCTCTTAAATGCTTTGTATCATGCTATTGC
TTCCCGTATGGCTTTCATTTTCTCCTTGTATAAATCCTGGTTGCTGTCTCTTTATGAGGAGTTGTGGCCGCTTGTGAGGCAAC
GTGGCGTGGTGTGCACTGTGTTTGTGACGCAACCCCACTGGTTGGGGCATGGCCACCACCTGTCAGCTCCTTCCGGGACTTTC
GCTTTCCCTCCCTATTGCCACGGCGGAACCTCATCGCCGCTGCTTGGCCGCTGCTGGACAGGGGCTCGGCTGTTGGGCACTGA
CAATTCGGTGGTGTGTCGGGAAAGCTGACGTCTTTCCATGGTGTCTGCTGCTGTTGCCACCTGGATTCTGCGCGGGACGTCCT
TCTGCTACGTCCTTCCGCCCTCAATCCAGCGGACCTTCTTCCCGCGGCTGCTGCGGCTCTGCGGCTCTTCCGCTCTTCCG
CTTCCGCTCAGACAGTCCGATCTCCTTTGGGCGGCTCCCGGCTGGAATCTGCAGATATCCGTTAGTAAATGAGTTGGAA
TTAATCTGTGGAATGTGTAGTTAGGGTGTGGAAAGTCCCGGCTCCCGAGCAGGAGGAGGAGGAGGAGGAGGAGGAGGAGGAGG
ATTAGTCAAGCAACAGGTGTGGAAGTCCCGAGGCTCCCGAGCAGGAGGAGGAGGAGGAGGAGGAGGAGGAGGAGGAGGAGGAGG
ATAGTCCCGCCCTAACTCCGCCATCCCGCCCTAACTCCGCCAGTTCGGCCATTCTCCGCCCATGGCTGACTAATTTTTTTT
TATTTATGCAGAGGCGAGGCGGCTCTGCTCTGAGCTATTCCAGAAGTAGTGAGGAGGCTTTTTTGGAGGCCTAGGCTTTTGCA
AAAAGCTCCCTGTTGACAATTAATCATCGGCATAGTATATCGGCATAGTATAATACGACAAGGTGAGGAACTAAACCATGGCCA
```

AGTTGACCAGTGCCGTTCCGGTGCTCACCGCGCGGACGTCGCCGGAGCGGTTCGAGTTCCTGGACCGACCGGCTCGGGTTCTCCCGG  
GACTTCGTGGAGGACGACTTCGCCGGTGTGGTCCGGGACGACGTACCCTGTTCAATCAGCGCGGTCCAGGACCAGGTGGTGCCGGA  
CAACACCCTGGCCTGGGTGTGGGTGCGCGGCCTGGACGAGCTGTACGCCGAGTGGTTCGGAGGTTCGTCCACGAACTTCGGGACG  
CCTCCGGGCGGCAATGACCGAGATCGCGGAGCGCCGTGGGGCGGGAGTTCGCCCTGCGCGACCCGCGGCAACTGCGTGCAC  
TTCGTGGCCGAGGAGCAGGACTGACAGTGCACGTGCTACGAGATTTAAATGGTACCTTTAAGACCAATGACTTACAAGGCAGCTGTAGATC  
TTAGCCACTTTTTAAAGAAAAGGGGGGACTGGAAGGGCTAGCTCACTCCCAACGAAGACAAGATCTGCTTTTTGCTTGTACTGG  
TCTCTCTGGTTAGACCAGATCTGAGCCTGGGAGCTCTCTGGCTGCCTAGGGAACCCACTGCTTAAGCCTCAATAAAGCTTGCCCTG  
AGTGTTCGAAGTAGTGTGTGCCCTCTGTTGTGTACTCTGGTAACTAGAGATCCCTCAGACCCTTTTAGTCAGTGTGGAAAATCT  
CTAGCACTAGTAGTTCATGTCATCTTATTATTTCAGTATTTATAACTTGCAAAAGAAATGAATATCAGAGAGTGAGAGGAACTTGTTT  
ATTGCAGCTTATAATGGTTACAAATAAAGCAATAGCATCACAAATTTACAAATAAAGCATTTTTTTCACTGCATTCTAGTGTGG  
TTTGTCCAAACTCATCAATGTATCTTATCATGTCTGGCTTAGTCACTCCGCCCCTAACCTCCGCCAGTTCCGCCCACTTCCCGCC  
CCATGGCTACTAATTTTTTTTATTATGACAGAGCCGAGGCCAGCTGTGTTTTCTAGACGTCAAGTGGCATTTCGCGGAAAT  
GTGCGCGGAACCCCTATTTGTTTTATTTTCTAAATACATTTCAAATATGTATCCGCTCATGAGACAATAACCCTGATAAATGCTTCA  
ATAATATTGAAAAGGAAGAGTATGAGTATTTCAACATTTCCGTGTGCCCTTATTCCTTTTTTTCGGCATTTCCTTCCTGTTT  
TTGCTCACCCAGAAACGCTGGTGAAGTAAAAGATGCTGAAGATCAGTTGGGTGCACGAGTGGGTACATCGAACTGGATCTCAAC  
AGCGGTAAGATCCTTGAGAGTTTTTCGCCCCGAAGACGTTTTTCCAATGATGAGCACTTTTAAAGTTCTGCTATGTGGCGCGGTATT  
ATCCCGTATTGACGCGGGCAAGAGCAACTCGGTGCGCGCATACTACTTCTCAGAATGACTTGGTGTGAGTACTCACCAGTCACAG  
AAAAGCATCTTACGGATGGCATGACAGTAAGAGAATTTATGCAGTGCCTGCCATAACCATGAGTGATAACACTGCGGCAACTTACTT  
CTGACAACGATCGGAGGACCGAAGGAGCTAACCGCTTTTTTGCACAACATGGGGGATCATGTAACCTGCCTTGATCGTTGGGAACC  
GGAGCTGAATGAAGCCATACCAACGACGAGCGTGACACCACGATGCCTGTAGCAATGGCAACAACGTTGCGCAAACTATTAACCTG  
GCGAACTACTTACTCTAGCTTCCCGGCAACAATTAATAGACTGGATGGAGGCGGATAAAGTTGCAGGACCCTTCTGCGCTCGGCC  
CTTCCGGCTGGCTGTTTTATTGCTGATAAATCTGGAGCCGGTGGCGTGGGCTCGCGGTATCATGTCAGCACTGGGGCCAGATGG  
TAAGCCCTCCCGTATCGTAGTTATCTACACGACGGGAGTAGGCAACTATGGATGAACGAAATAGACAGATCGCTGAGATAGGTG  
CCTCACTGATTAAGCATTGGTAACTGTGACACCAAGTTTACTCATATACTATTAGATTGATTTAAAACCTTCATTTTTAATTTAAA  
AGGATCTAGGTGAAGATCCTTTTTTATAATCTCATGACCAAAATCCCTTAACGTGAGTTTTCTGTTCCACTGAGCGTCAGACCCGCT  
AGAAAAGATCAAAGGATCTTCTTGAGATCCTTTTTTCTGCGCGTAATCTGCTGCTTGCAACAAAAAACCCGCTACCAGCGG  
TGTTTTGTTTCCGGATCAAGAGCTACCAACTCTTTTTCCGAAGGTAACCTGGCTTACGACAGCGCAGATACCAATACTGTCTCT  
CTAGTTAGCCGTAGTTAGGCCACCCTTCAAGAACTCTGTAGCACCCTACATACCTCGCTCTGCTAATCCTGTTACCAGTGGC  
TGCTGCCAGTGGCGATAAGTCTGTCTTACCAGGTTGGACTCAAGACGATAGTTACCAGGATAAGGCGCAGCGGTGGGGCTGAACGG  
GGGTTTCGTGGACACAGCCAGCTTGAGGCGAACGACCTACCCGAACTGAGATACCTACAGCGTGAGATGAGAAAAGGGCCAG  
CTTCCGAGGAGGAAAAGGCGGACAGGTATCCGGTAAGCGGAGGTCGGAACAGGAGCGCAGGAGGATGCTCCAGGGGCAAAA  
CGCTGGTATCTTTATAGTCTGTGCGGTTTTCCGCACTCTGACTGAGCGTCAATTTTTGTGATCTGCTCAGGGGGCGGAGCC  
TATGGAAAACGCCAGCAACGCGGCTTTTTACGGTTCTTGGCTTTTTGCTGGCTTTTTGCTCACATGTTCTTTCTGCGTTATCC  
CCTGATCTGTGGATAACCGTATTACCGCTTTGAGTGAGCTGATACCGCTCGCCGACGCCGAAACGACCGAGCGCAGCGAGTCACT  
GAGCGAGGAAGCGGAAAGAGCGCCCAATACGAAAACCGCTCTCCCGCGCTTGGCCGATTCAATTAATGACAGTGGCACGACAGGT  
TTCCCGACTGGAAGCGGGCAGTGAAGCGCAACGCAATTAATAGTGAAGTGGTACTCACTCATTAGGCACCCAGGCTTTACACTTTATG  
CTTCCGGCTCGTATGTTGTGTGGAATTTGTGAGCGGATAAATACTTACACAGGAAACAGCTATGACCATGATTACGCCAAGCGCC  
AATTAACCCCTCACTAAAGGGAACAAAAGCTGGAGTGCAGACTTAATGTAGTCTTATGCAATACTCTTGTAGTCTTGCAACATGGT  
AACGATGAGTTAGCAACATGCCTTACAAGGAGAGAAAAGCACCCTGCATGCCGATTGGTGAAGTAAGGTGGTACGATCGTGCCT  
TATTAGGAAGGCAACAGACGGGTCTGACATGGATTGGACGAACCCTGAATTGCCGATTCAGAGATATTGATTTAAGTGCCTA  
GCTCGATAACAATAACGGGTCTCTCTGTTAGACCAGATCTGAGCTGGGAGCTCTCTGGCTAACTAGGGAACCCACTGCTTAAGC  
CTCAATAAAGCTTGCTTGAGTGTCTCAAGTAGTGTGTGCCCTCTGTTGTGTGACTCTGGTAACTAGAGATCCCTCAGACCCCTT  
TAGTCAGTGTGGAAAATCTCTAGCAGTGCGCCCCAACAGGGACCTGAAAGCGAAAAGGAAACCAGAGCTCTCTCGACGCAGGACT  
CGGCTTGCTGAAGCGCGCAGCGCAAGAGGCGAGGGCGCGACTGCTGAGTACGCCAAAAATTTGACTAGCGGAGGCTAGAAGGA  
GAGAGATGGGTGCGCAGCGTCACTATTAAGCGGGGGAAGAAATTAGATCGCGATGGGAAAAAATTCGGTTAAGGCCAGGGGGAAGA  
AAAAATATAAATTAACAATATAGTATGGGCAAGCAGGGAGCTAGAACGATTTCGAGTAAATCCTGGCCTGTTAGAAAACATCAGAA  
GGCTGTAGACAAATACTGGGACAGCTACAACCATCCCTCAGACAGGATCAGAAGAACTTAGATCATTATATAATACAGTAGCAAC  
CCTCTATTGTGTGCATCAAAGGATAGAGATAAAAGACACCAAGGAAGCTTTAGACAAGATAGAGGAAGAGCAAAAACAAAAGTAAGA  
CCACCGCACAGCAAGCGGCCGCTGATCTTCAGACCTGGAGGAGGAGATATGAGGGACAATGGAGAAGTGAATTATATAAATATAA  
AGTAGTAAAAATTAACCAATTAGGAGTAGCACCCACCAAGGCAAGAGAAGAGTGGTGCAGAGAGAAAAGAGCAGTGGGAATAG  
GAGCTTTGTTCTTGGGTTCTTGGAGCAGCAGGAAGCAGCTATGGGCGCAGCTCAATGACGCTGACGTTGACGCGCAGCAATTA  
TTGTCTGGTATAGTGCAGCAGCAGAACAATTTGCTGAGGGCTATTGAGGCGCAACAGCATCTGTTGCAACTCACAGTCTGGGGCAT  
CAAGCAGCTCCAGGCAAGAATCCTGGCTGTGGAAGATACTAAAGGATCAACAGCTCCTGGGGATTTGGGGTTGCTCTGGA  
TCATTGCAACACTGCTGTGCCTTGAATGCTAGTTGGAGTAATAAATCTCTGGAACAGATTGGAATCACACGACCTGGATGGAGT  
GGGACAGAGAAATTAACAATTACACAAGCTTAATACACTCCTTAATTGAAGAATCGAAAACAGCAAGAAAAGAAATGAACAAGAA  
TTATTGGAATTAGATAAATGGGCAAGTGTGTGGAATTTGTTAAACATAACAAATTTGGCTGTGGTATATAAATTTATTCATAATGAT  
AGTAGGAGGCTTGGTAGGTTAAGAATAGTTTTGCTGTACTTTCTATAGTGAATAGAGTTAGGCAGGGATATTCACCATTTATCGT  
TTCAGACCCTCCCAACCCGAGGGGACCCGACAGGCCAAAGGAATAGAAGAAAGGTTGGAGAGAGACAGACAGATATCC  
ATTCGATTAGTGAACGGATCTCGACGGTTAACTTTTAAAGAAAAGGGGGGATTGGGGGTACAGTGCAGGGGAAAGAAATAGTAGA  
CATAATAGCAACAGACATACAACTAAAGAATTACAAAACAAATTAACAAAATTCAAAATTTTATTCCAGTGTGGTGAATTCGT  
CAGTCTGC

**Supplementary Table 5. Sequence of transgene cassette for C503 (pLV-hEF1a-prepro-CGRP-IRES-mKate2-2A-bla)**

*color coding key:*

prepro-CGRP: human prepro-CGRP alpha

IRES: Internal ribosome entry site

mKate2: Red fluorescent protein

2A: Autoproteolytic viral amino acid sequence

Bla: Blasticidin resistance gene

*sequence:*

```
ATGGGCTTCCAAAAGTTCTCCCCCTTCTGGCTCTCAGCATCTTGGTCTGTTGCAGGCAGGCAGCCTCCATGCAGCACCATTTCAG
GTCTGCCCTGGAGAGCAGCCAGCAGACCCGGCCACGCTCAGTGAGGACGAAGCGCCTCCTGCTGGCTGCACTGGTGCAGGACT
ATGTGCAGATGAAGGCCAGTGAGCTGGAGCAGGAGCAAGAGAGAGAGGGCTCCAGAATCATTGCCAGAAGAGAGCCTGTGACACT
GCCACCTGTGTGACTCATCGGCTGGCAGGCTTGTGAGCAGATCAGGGGTGTGGTGAAGAACAACCTTTGTGCCACCAATGTGGG
TTCCAAAGCCTTTGGCAGGCGCCGACGGACCTTCAAGCCTGAGACTGGGATCCGCCCTCTCCCTCCCCCCCCCTAACGTTACT
GGCCGAAGCCGCTTGAATAAGGCCGTGTGCGTTGTCTATATGTTATTTTCCACCATATTGCCGCTCTTTTGGCAATGTGAGGGC
CCGAAACCTGGCCCTGTCTTCTTGACGAGCATTCTAGGGGTCTTCCCTCTCGCCAAAGGAATGCAAGGTCTGTTGAATGTCG
TGAAGGAAGCAGTTCTCTGGAAGCTTCTTGAAGACAAACAACGCTCTGTAGCGACCCTTTCAGGCAGCGGAACCCCCACCTGGC
GACAGGTGCCTCTGCGCCAAAAGCCACGTGTATAAGATACACCTGCAAAGGCGGCACAACCCAGTGCCACGTTGTGAGTTGGAT
AGTTGTGAAAGAGTCAAATGGCTCTCCTCAAGCGTATTCAACAAGGGGCTGAAGGATGCCAGAAAGGTACCCCATTTGATGGGAT
CTGATCTGGGCGCTCGGTACACATGCTTTACATGTGTTTAGTCGAGGTTAAAAAACGCTTAGGCCCCCGAACCCAGGGGACGTG
GTTTTCTTTGAAAAACACGATGATAAATAGGCCACAGCCACCATGGTGAGCGAGCTGATTAAGGAGAACATGCACATGAAGCTGT
ACATGGAGGGCACCGTGAACAACCACCACTTCAAGTGACATCCGAGGGCGAAGGCAAGCCCTACGAGGGCACCCAGACCATGAGA
ATCAAGGCGGTGAGGGCGGCCCTCTCCCTTCGCTTCGACATCCTGGCTACCAGCTTCATGTACGGCAGCAAAACCTTCATCAA
CCACACCCAGGGCATCCCCGACTTCTTTAAGCAGTCCTTCCCCGAGGGCTTCACATGGGAGAGAGTACCACATACGAAGATGGG
GCGTGCTGACCGCTACCCAGGACACCAGCCTCCAGGACGGCTGCCTCATCTACAACGTCAGATCAGAGGGGTGAACCTCCCATCC
AACGGCCCTGTGATGCAGAAGAAAACACTCGGCTGGGAGGCCTCCACCGAGACACTGTACCCCGCTGACGGCGGCCTGGAAGGCAG
AGCCGACATGGCCCTGAAGCTCGTGGGCGGGGGCCACCTGATCTGCAACCTTAAGACCACATACAGATCCAAGAAACCCGCTAAGA
ACCTCAAGATGCCCCGCGTCTACTATGTGGACAGGAGACTGGAAAGAATCAAGGAGGCCGACAAAGAGACATACGTCGAGCAGCAC
GAGGTGGCTGTGGCCAGATACTGCGACCTCCCTAGCAAACCTGGGGCACAACCTTAATTCCGCTGAGGGCCGCGGCAGCCTGCTGAC
CTGCGGCGACGTGGAGGAAAACCCAGGCCCAATGGCTAAGCCTTGTCTCAAGAAGAATCCACCCTCATTGAAAGGCAACGGCTA
CAATCAACAGCATCCCATCTCTGAAGACTACAGCGTCGCCAGCGCAGCTCTCTTAGCGACGGCCGATCTTCACTGGTGTCAAT
GTATATCATTTTACTGGGGACCTTGTGCAGAACTCGTGGTGTCTGGGCACTGCTGCTGCTGCGGCAGCTGGCAACCTGACTTGTAT
CGTCGCGATCGGAAATGAGAACAGGGGCATCTTGAGCCCCTGCGGACGGTGCCGACAGGTGCTTCTCGATCTGCATCCTGGGATCA
AAGCCATAGTGAAGGACAGTGATGGACAGCCGACGGCAGTTGGGATTCGTGAATTGCTGCCCTCTGGTTATGTGTGGGAGGGATAA
```

**Supplementary Table 6. Sequence of transgene cassette for C504 (pLV-hEF1a-myc-RAMP1-IRES-mKate-2A-bla)**

*color coding key:*

myc-RAMP: Human receptor-activity modifying protein 1 preceded by the H. influenza hemagglutinin signal peptide and the c-myc epitope

IRES: Internal ribosome entry site

mKate2: Red fluorescent protein

2A: Autoproteolytic viral amino acid sequence

Bla: Blasticidin resistance gene

*sequence:*

```
ATGAAGACCATCCTGGCCCTGAGCACCTACATCTTCTGCCTGGTGTTCGCCGAGCAGAAGCTGATCAGCGAGGAGGACCTGGCCTG
CCAGGAGGCTAACTACGGTGCCCTCCTCCGGGAGCTCTGCCTCACCAGTTCCAGGTAGACATGGAGGCCGTCGGGGAGACTCTGT
GGTGTGACTGGGGCAGGACCATCAGGAGCTACAGGGAGCTGGCCGACTGCACCTGGCACATGGCGGAGAAGCTGGGCTGCTTCTGG
CCCAATGCAGAGGTGGACAGGTTCTTCCTGGCAGTGCATGGCCGCTACTTCAGGAGCTGCCCCATCTCAGGCAGGGCCGTCGGGGA
CCCGCCCGGCAGCATCCTCTACCCCTTCATCGTGGTCCCACATCAGGTGACCCTGCTGGTGACGGCACTGGTGGTCTGGCAGAGCA
AGCGCACTGAGGGCATTGTGTAGGACTGGGATCCGCCCTCTCCCTCCCCCCCCCTAACGTTACTGGCCGAAGCCGCTTGAATA
AGGCCGGTGTGCGTTTGTCTATATGTTATTTCCACCATATTGCCGCTCTTTGGCAATGTGAGGGCCCGAAACCTGGCCCTGTCT
TCTTGACGAGCATTCCTAGGGTCTTCCCTCTCGCCAAAGGAATGCAAGTCTGTGAATGTCGTGAAGGAAGCAGTTCCTCTG
GAAGCTTCTTGAAGACAAACAACGCTGTAGCGACCCTTTCAGGCAGCGGAACCCCCACCTGGCGACAGGTGCCTCTGCGGCCA
AAAGCCACGTGTATAAAGATACACCTGCAAAGGCGGCACAACCCAGTGCCACGTTGTGAGTTGGATAGTTGTGGAAAGAGTCAAA
GGCTCTCCTCAAGCGTATTCAACAAGGGGCTGAAGGATGCCAGAAAGGTACCCCATGTATGGGATCTGATCTGGGGCCTCGGTAC
ACATGCTTTACATGTGTTAGTCGAGGTTAAAAAAGCTCTAGGCCCCCGAACCCAGGGGACGTGGTTCCTTTGAAAAACACC
ATGATAATATGGCCACAGCCACCATGGTGAGCGAGCTGATTAAGGAGAACATGCACATGAAGCTGTACATGGAGGGCACCGTGAAC
AACCACCACTTCAAGTGCACATCCGAGGGCGAAGCAAGCCCTACGAGGGCACCAGACCATGAGAATCAAGGCGGTCGAGGGCGG
CCCTTCCCCTTCGCCTTCGACATCCTGGCTACCAGCTTCATGTACGGCAGCAAACCTTCATCAACCACACCCAGGGCATCCCCG
ACTTCTTTAAGCAGTCTTCCCCGAGGGCTTCACATGGGAGAGAGTCACCACATACGAAGATGGGGGCGTGCTGACCGCTACCCAG
GACACCAGCCTCCAGGACGGCTGCCTCATCTACAAGTCAAGATCAGAGGGGTGAACTTCCCATCCAACGGCCCTGTGATGCAGAA
GAAAACACTCGGCTGGGAGGCCTCCACCGAGACACTGTACCCCGTGACGGCGGCCTGGAAGGCAGAGCCGACATGGCCCTGAAGC
TCGTGGGCGGGGCCACCTGATCTGCAACCTTAAGACCACATACAGATCCAAGAAACCCGCTAAGAACCTCAAGATGCCCGGCGTC
TACTATGTGGACAGGAGACTGGAAGAATCAAGGAGGCCGACAAAGAGACATACGTCGAGCAGCACGAGGTGGCTGTGGCCAGATA
CTGCGACCTCCCTAGCAAACCTGGGGCACAAACTTAATTCGCTGAGGGCCGCGGCAGCTGCTGACCTGCGGGCAGCTGGAGGAAA
ACCCAGGCCAATGGCTAAGCCTTTGTCTCAAGAAGAATCCACCCCATTTGAAAGAGCAACGGCTACAATCAACAGCATCCCCATC
TCTGAAGACTACAGCGTCGCCAGCGCAGCTCTCTTAGCGACGGCCGCATCTTCACTGGTGTCAATGTATATCATTTTACTGGGGG
ACCTTGTGCAGAACTCGTGGTGTGGGCACCTGCTGCTGCTGCGGCAGCTGGCAACCTGACTTGTATCGTCGCGATCGGAAATGAGA
ACAGGGGCATCTTGAGCCCTGCGGACGGTGCCGACAGGTGCTTCTCGATCTGCATCCTGGGATCAAAGCCATAGTGAAGGACAGT
GATGGACAGCCGACGGCAGTTGGGATTCGTGAATTGCTGCCCTCTGGTTATGTGTGGGAGGATAA
```

**Supplementary Table 7. Sequence of transgene cassette for C505 (pLV-hEF1a-HA-CALCRL-IRES-EYFP-2A-Hygro)**

*color coding key:*

HA-CALCRL: Human calcitonin receptor-like receptor preceded by the H. influenza hemagglutinin signal peptide and the influenza hemagglutinin antigen (HA) sequence

IRES: Internal ribosome entry site

EYFP: Enhanced yellow fluorescent protein

2A: Autoproteolytic viral amino acid sequence

Hygro: Hygromycin resistance gene

*sequence:*

```
ATGAAGACCATCCTGGCCCTGAGCACCTACATCTTCGCTGGTGTTCGCCCTACCCCTACGACGTGCCCGTGTACGCCGAGAAAT
AGAAGAGAGTCCCTGAGGACTCAATTCAGTTGGGAGTTACTAGAAAATAAAATCATGACAGCTCAATATGAATGTTACCAAAAGATTA
TGCAAGACCCCATTCACAAGCAGAAGGCGTTTACTGCAACAGAACCTGGGATGGATGGCTCTGCTGGAACGATGTTGCAGCAGGA
ACTGAATCAATCGAGCTCTGCCCTGATTACTTTAGGACTTTGATCCATCAGAAAAAGTTACAAAAGATCTGTGACCAAGATGGAAA
CTGGTTTAGACATCCAGCAAGCAACAGAACATGGACAAAATATACCCAGTGTAAATGTTAACACCCACGAGAAAAGTGAAGACTGCAC
TAAATTTGTTTTACCTGACCATAATGGACACGGATGTCTATTGCATCACTGCTTATCTCGCTTGGCATATTTCTTTATTTCAAG
AGCCTAAGTTGCCAAAGGATTACCTTACACAAAAATCTGTTCTTCTCATTTGTTTGTAACTCTGTTGTAACAATCATTACACCTCAC
TGCAGTGGCCAACAACCAGGCCCTTAGTAGCCACAAATCCTGTTAGTTGCAAAGTGTCCAGTTCATTCATCTTTACCTGATGGGCT
GTAATTACTTTTGGATGCTCTGTGAAGGCATTTACCTACACACACTCATTGTGGTGGCCGTGTTTGCAGAGAAGCAACATTTAATG
TGGTATATTTTCTTGGCTGGGATTTCCACTGATTCCTGCTGTATACATGCCATGCTAGAAGCTTATATTACAATGACAATTG
CTGGATCAGTTCTGATACCCATCTCCTCTACATTATCCATGGCCCAATTTGTGCTGCTTTACTGGTGAATCTTTTTTCTTGTAA
ATATTGTACGCTTCTCATCACCAAGTTAAAAGTTACACACCAAGCGGAATCCAATCTGTACATGAAAGCTGTGAGAGCTACTCTT
ATCTTGGTGCCATTGCTTGGCATTGAATTTGTGCTGATTCCATGGCGACCTGAAGGAAAGATTGCAGAGGAGGTATATGACTACAT
CATGCACATCCTTATGCACTTCCAGGGTCTTTTGGTGTCTACCATTTTCTGCTTCTTAATGGAGAGGTTCAAGCAATTTCTGAGAA
GAACTGGAATCAATACAAAATCCAATTTGGAAACAGCTTTTCCAACTCAGAAGCTCTTCGTAGTGGCTTTACACAGTGTCAACA
ATCAGTGATGGTCCAGGTTATAGTCATGACTGTCTAGTGAACACTTAAATGAAAAAGCATCCATGATATTGAAAATGTTCTCTT
AAAACAGAAAATTTATATAATTGAGACTGGGATCCGCCCTCTCCCTCCCCCCCCCTAACGTTACTGGCCGAGCCGCTTGGAA
TAAGCCGGTGTGCGTTTGTCTATATGTTATTTTTCCACCATATTGCCGTCTTTTGGCAATGTGAGGGCCCGAAAACCTGGCCCTGT
CTTCTTGACGAGCATTCCTAGGGGTCTTTCCCTCTCGCCAAAGGAATGCAAGGTCTGTTGAATGTCGTGAAGGAAGCAGTTCCTC
TGGAAGCTTCTTGAAGACAAACAACGCTCTGTAGCGACCCTTTCAGGCGAGCGGAACCCCCACCTGGCGACAGGTGCCCTGCGGC
CAAAAGCCACGTGTATAAGATACACCTGCAAAGGGGCGACAACCCAGTGCACGTTGTGAGTTGGATAGTTGTGAAAGAGTCAA
ATGGCTCTCCTCAAGCGTATTCAACAAGGGGCTGAAGGATGCCAGAAGGTACCCCATTTGATGGGATCTGATCTGGGGCCTCGGT
ACACATGCTTTACATGTGTTTAGTCGAGGTTAAAAAACGCTTAGGCCCCCGAACCCAGCGGGACGTTGGTTTCTTTGAAAACA
CGATGATAAATATGGCCACAGCCACATGGTGAGCAAGGGCGAGGAGCTGTTCCCGGGTGGTGCCCATCTGGATCGAGCTGGACG
CGCAGCTAAACGGCCACAAGTTCCAGCGTGTCCGGCGAGGGCGAGGGCGATGCCACCTACGGCAAGCTGACCCTGAAGTTTATCTC
ACCACCGGAAGCTGCCCGTGGCCACCCCTCGTGACCACCTTCGGCTACGGCTGCAGTGTCTCGCCCGCTACCCCGACCA
CATGAAGCAGCAGACTTCTTCAAGTCCGCCATGCCGAAGGCTACGTCAGGAGCGCACCATCTTCTTCAAGGACGACGGCACT
ACAAGACCCGCGCCGAGGTGAAGTTCGAGGGCGACACCCTGGTGAACCGCATCGAGCTGAAGGGCATCGACTTCAAGGAGGACGGC
AACATCCTGGGGCACAAGCTGGAGTACAACACTACAACAGCCACAACGCTTATATCATGGCCGACAAGCAGAAGAAGGCATCAAGGT
GAACTCAAGATCCGCCACAACATCGAGGACGGCAGCGTGCAGCTCGCCGACCACTACCAGCAGAACACCCCATCGGGCAGCGCC
CCGTGCTGCTGCCGACAACCCTACCTGAGCTACCAAGTCCAAGTGAAGTTCATATGCGCGATTTGCTGATCCCATGTTGATCACTCCTG
CTGGAGTTCGTGACCGCCCGGGATCACTCTCGGCATGGACGAGCTGTACAAGCAATGGAGGGCGCGGAGCCTGCTGACCTG
CGGGCAGCTGGAGGAAAACCCCGGCCCATGAAAAAGCCTGAACTCACCGCAGCTCTGTGAGAAAGTTCTGATCGAAAAGTTCG
ACAGCGTGTCCGACCTGATGCAGCTCTCGGAGGGCGAAGAATCTCGTGTCTTTCAGCTTCGATGTAGGAGGGCGTGGATATGTCCTG
CGGGTAAATAGCTGCGCCGATGTTTCTACAAAGATCGTTATGTTTATCGGCACCTTTCATCGGCCGCGCTCCCGATTCCGGAAGT
GCTTGACATTTGGGGAATTCAGCGAGAGCCTGACCTATTGCATCTCCCGCCGTGCACAGGGTGTACGTTGCAAGACCTGCCTGAAA
CCGAACTGCCCTGTTCTGACGCCGCTCGCGAGGCCATGGATGCGATCGCTGCGGCCGATCTTAGCCAGACGAGCGGGTTCGGC
CCATTCGGACCCGCAAGGAATCGGTCAATACACTACATGCGTGTATTTCAATGCGCGATTTGCTGATCCCATGTTGATCACTCCTG
GCAAATGTGATGGACGACACCGTCACTGCGTCCGTCGCGCAGGCTCTCGATGAGCTGATGCTTTGGGCCGAGGACTGCCCGAAG
TCCGGACCTCGTGCACGCGGATTTCCGCTCCAACAATGCTCTGACGGACAATGGCCGATAACAGCGGTCAATGACTGGAGCGAG
GCGATGTTCCGGGATTTCCAATACGAGGTCGCCAACATCTTCTTTCGGAGGCCGTGGTTGGCTTGTATGGAGCAGCAGACGCGCTA
CTTCGAGCGGAGGCATCCGGAGCTTGCAGGATCGCCGCGGCTCCGGGCGTATATGCTCCGATTTGGTCTTGACCAACTCTATCAGA
GCTTGGTTGACGGCAATTTGATGATGCAGCTTGGGCGCAGGGTTCGATGCGACGCAATCGTCCGATCCGGAGCCGGGACTGTCCGG
CGTACAAAATCGCCCGCAGAAGCGCGCCGCTTGACCGATGGTGTGTAGAAGTACTCGCCGATAGTGGAAACCGACGCCCCAG
CACTCGTCCGGATCGGGAGATGGGGGAGGCTAACTGA
```

**Supplementary Table 8. Sequence of transgene cassette for C512: pLV-hEF1a-Glo22F-IRES-H2B-Cerulean-2A-puro**

*color coding key:*

Glo22F: Engineered cAMP-responsive luciferase (Promega Corp.)

IRES: Internal ribosome entry site

H2B-Cerulean: DNA binding domain of histone 2B fused to Cerulean

2A: Autoproteolytic viral amino acid sequence

Puro: Puromycin resistance gene

*sequence:*

```
ATGCC TGGCG CAGTAGG CAAGGTGGT GCCCTTCATCG AGGCTAAGTGGTGGACTTGGACACTGGTAAGACACTGGGTGTGAACCA
GCGCGGCGAGCTGTGCGTCCGTGGCCCATGATCATGAGCGGCTACGTTAACAACCCGAGGCTACAACGCTCTCATCGACAAGG
ACGGCTGGCTGCACAGCGGCGACATCGCCTACTGGGACGAGGACGAGCACTTCTTCATCGTGGACCGGCTGAAGAGCCTGATCAAA
TACAAGGGTACCAGGTAGCCCCAGCCGAACCTGGAGAGCATCTGCTGCAACACCCCAACATCTTCGACGCCGGGGTCCGCGGCT
GCCCGACGACGATCCGCGGAGCTGCCCGCCGAGTCTGTCGTGCTGGAACACGGTAAAACCATGACCGAGAAGGAGATCGTGGACT
ATGTGCCAGCCAGGTTACAACCCGCAAGAAGCTGCGCGTGGTGTGTGTAGTGGACGAGGTGCCTAAAGGACTGACCCGCAAG
TTGGACGCCCCGAAGATCCGCGAGATTCTCATTAAGCCAAAGAAGGGATCCAATTGGGATTCTGGGTGCTCCAGAGAAGGTATGTA
TGAAAGCTTTATTGAGTCACTGCCATTCTTAAATCTTTGGAGTTTTCTGCACGCTGAAAGTAGTAGATGTGATAGGCACCAAAG
TATACAACGATGGAGAACAATCATGTCTCAGGGAGATTCCGGCTGATTCTTTTTTCATTATTGAACTGAGAGAAGTGAATAATTACT
ATGAAAAGAAAGGGTAAATCAGAAGTGAAGAGAATGGTGCAGTAGAAAATCGCTCGATGCTCGCGGGGACAGTACTTTGGAGAGCT
TGCCCTGGTAACATAACAACTCGAGCAGCTTCTGCCACGCCATTGGGACTGTCAAATGTTTAGCAATGGATGTGCAAGCATTTG
AAAGGCTTCTGGGACTTGCATGGAAATTATGAAAAGGAACATCGTACCTATGAAGAACAGTTAGTTGCCCTGTATGGAACGAAC
ATGGATATTGTAGCCAAAAACATTAAGAAGGGCCAGCCATTCTACCCACTCGAAGACGGGACCCGCGGACAGCTGCACAA
AGCCATGAAGCGCTACGCCCTGGTGCCCGCACCATCGCCTTTACCGACGCACATATCGAGGTGGACATTACCTACGCCGAGTACT
TCGAGATGAGCGTTCCGGCTGGCAGAAGCTATGAAGCGCTATGGGCTGAATACAAACCATCGGATCGTGGTGTGCAGCGAGAATAGC
TTGCACCCCGGCTTCAACGAGTACGACTTCGTGCCCGAGAGCTTCGACCCGGGACAAAACCATCGCCCTGATCATGAACAGTAGTGG
CAGTACCGGATTGCCAAAGGGCGTAGCCCTACCGCACCGCACCGCTTGTGTCCGATTCAAGTATGCCCCGCGACCCCATCTTCGGCA
ACCAGATCATCCCCGACACCGCTATCCTCAGCGTGGTGCCATTTACCACGGCTTCGGCATGTTACCACGCTGGGCTACTTGATC
TGCGGCTTTTCGGGTGCTGCTCATGTACCGCTTCGAGGAGGAGCTATCTTGGCGAGCTTGCAAGACTATAAGATTCAATCTGCCCT
GCTGGTGCCACACTATTTAGCTTCTTCGCTAAGAGCACTCTCATCGACAAGTACGACCTAAGCAACTTGCACGAGATCGCCAGCG
GCGGGGCGCGCTCAGCAAGGAGGTAGGTGAGGCCGTGGCCAAACGCTTCCACCTACCAGGCATCCGCCAGGGCTACGGCCTGACA
GAAACAACCGCCCATTTGATCACTCCAGAAGGGGTTAAAGACTGGGATCCGCCCTTCCCTCCCCCCCCTAACGTTACTG
GCCGAAGCCGCTTGAATAAAGGCCGCTGTGCGTTTTGCTATATGTATTATTTCCACCATATTGCCGCTTTTGGCAATGTGAGGGCC
CGGAAACCTGGCCCTGTCTTCTTGACGAGCATTCCTAGGGGTCTTCCCTCTCGCCAAAGGAATGCAAGGTCTGTTGAATGTCGT
GAAGGAAGCAGTTCCTCTGGAAGCTTCTTGAAGACAACAACGCTCTGTAGCGACCTTTGCAGGCAGCGGAACCCCCACCTGGCG
ACAGGTGCCTCTGCGGCCAAAAGCCACGTGTATAAGATACACCTGCAAAGGCGGCACAACCCAGTGCCACGTTGTGAGTTGGATA
GTTGTGGAAGAGTCAAATGGCTCTCCTCAAGCGTATTCAACAAGGGGCTGAAGGATGCCAGAAGTACCCCATTTGTATGGGATC
TGATCTGGGGCTCGGTACACATGCTTTACATGTGTTAGTTCGAGGTAAAAAACGCTAGGCCCCCGAACCACGGGGACGTGG
TTTTCTTTGAAAAACACGATGATAATATGGCCACAGCCACCATCCGACAGCCAGCGAAGTCTGCTCCCGCCCCGAAAAAGGGCTC
CAAGAAGGCGGTGACTAAGGCGCAGAAGAAAGGCGCAAGAAGCGCAAGCGCAGCCGCAAGGAGAGCTATTCCATCTATGTGTACA
AGGTTCTGAAGCAGGTCCACCCTGACACCGGCATTTCTGTTCAAGGCCATGGGCATCATGAATTCGTTTGTGAACGACATTTTCGAG
CGCATCGAGGTGAGGCTTCCCGCTGGCGCATTACAACAAGCGCTCGACCATCACCTCCAGGGAGATCCAGACGGCCGTGCGCCT
GCTGCTGCCTGGGGAGTTGGCCAAGCACGCCGTGTCGAGGGTACTAAGGCCATACCAAGTACACCAGCGCTAAGGATCCCCGGG
TACCGGTCCGCCACCATGGTGAGCAAGGGCGAGGAGCTGTTACCCGGGTGGTGCCATCCTGGTCCGAGCTGGACGGCGACGTAAC
GGCCACAAGTTCAGCGTCTCCGGCAGGGCGAGGGCGATGCCACCTACGGCAAGCTGACCCCTGAAGTTCATCTGCACCACCGGCAA
GCTGCCCGTGCCCTGCCACCTCGTGACCACCTGACTGGGGCGTGCAGTGTCTCGCCCGTACCCCGACCATGAAGAGCAGC
ACGACTTCTTCAAGTCCGCCATGCCGAAGGCTACGTCCAGGAGCGCACCATCTTCTTCAAGGACGACGGCAACTACAAGACCCGC
GCCGAGGTGAAGTTCGAGGGCGACACCCTGGTGAACCGCATCGAGCTGAAGGGCATCGACTTCAAGGAGGACGGCAACATCTGGG
GCACAAGCTGGAGTACAACGCCATCAGCGACAACGCTATATACCGCCGACAAGCAGAAGAAGCGCATCAAGGCCAACTTCAAGA
TCCGCCACAACATCGAGGACGGCAGCGTGCAGCTCGCCGACCATACCAGCAGAACACCCCATCGGCGACGGCCCGTGTGCTGCTG
CCCCACAACCATCTGAGCACCCAGTCCAAGCTGAGCAAAAGACCCCAAGAGCGGATCACATGGTCTGCTGGAGTTCGT
GACCGCCCGGGATCACTCTCGCATGGACGAGCTGTACAAGGAGGGCCGCGGACGCTCCCCGGGCCGTACGCACCCCTCGCCGC
ACCCCGGCCATGACCGAGTACAAGCCACCGTGCCTCGCCACCCGCGACGACGCTCCCCGGGCCGTACGCACCCCTCGCCGC
GCGTTCCGCGACTACCCCGCCACGCGCCACACCGTGCAGCCGACCGCCACATCGAGCGGGTACCGAGCTGCAAGAACTCTTCTC
CACGCGCTCGGGCTGCATCGGCAAGGTGTGGGTGCGGACGACGGCGCCGCGGTGGCGGTCTGGACCACGCCGGAGAGCGTGC
```

AAGCGGGGCGGTGTTGCGCCGAGATCGGCCCGCGCATGGCCGAGTTGAGCGGTTCCGGCTGGCCGCGCAGCAACAGATGGAAGGC  
CTCCTGGCGCCGCACCGGCCAAGGAGCCCGCGTGGTTCCTGGCCACCGTCGGCGTGTGCGCCGACCACCAGGGCAAGGGTCTGGG  
CAGCGCCGTCGTGCTCCCGGAGTGGAGGCGGCCGAGCGCGCCGGGTGCCCGCCTTCCTGGAGACCTCCGCGCCCCGCAACCTCC  
CCTTCTACGAGCGGCTCGGCTTCACCGTCACCGCCGACGTCGAGGTGCCCGAAGGACCGCGCACCTGGTGCATGACCCGCAAGCCC  
GGTGCCTGA
